# Supplementary material for: IL-4 Mediated Resistance of BALB/c Mice to Visceral Leishmaniasis Is Independent of IL-4Rα Signaling via T Cells
Source: PubMed Central journal article supplement (PMC6707061; doi:10.3389/fimmu.2019.01957), 2019-08-16

## IL-4 mediated resistance of BALB/c mice to visceral leishmaniasis is independent of IL-4R $\alpha$ signalling via T cells’.

### SUPPLEMENTARY INFORMATION

#### Page

- 7 **Table S1:** *L. donovani* parasite burdens in the spleen, liver and bone marrow of CD4<sup>+</sup> T cell-specific IL-4R $\alpha$ -deficient (Lck<sup>cre</sup>IL-4R $\alpha$ <sup>-/lox</sup>) mice, wild-type littermate control (IL-4R $\alpha$ <sup>-/lox</sup>) and global IL-4R $\alpha$ <sup>-/-</sup> BALB/c mice at days 14 or 15 post-infection.
- 7 **Table S2:** Granuloma maturation in *L. donovani* infected CD4<sup>+</sup> T cell-specific IL-4R $\alpha$ -deficient (Lck<sup>cre</sup>IL-4R $\alpha$ <sup>-/lox</sup>) mice, wild-type littermate control (IL-4R $\alpha$ <sup>-/lox</sup>) and global IL-4R $\alpha$ <sup>-/-</sup> BALB/c mice at day 14 and 15 post-infection.
- 8 **Figure S1:** Representative photomicrographs of the hepatic granuloma response in an *L. donovani* infected wild-type (IL-4R $\alpha$ <sup>-/lox</sup>), CD4<sup>+</sup> T cell-specific IL-4R $\alpha$ -deficient (Lck<sup>cre</sup>IL-4R $\alpha$ <sup>-/lox</sup>), and global IL-4R $\alpha$ <sup>-/-</sup> mice at days 15 post-infection.

**Table S1:** *L. donovani* parasite burdens in the spleen, liver and bone marrow of CD4<sup>+</sup> T cell-specific IL-4R $\alpha$ -deficient (Lck<sup>cre</sup>IL-4R $\alpha$ <sup>-/lox</sup>), wild-type littermate control (IL-4R $\alpha$ <sup>-/lox</sup>) and global IL-4R $\alpha$ <sup>-/-</sup> BALB/c mice at different times post-infection. Mice were infected with *L. donovani* on day 0 and parasite burdens were determined on day 14 or 15 in separate experiments.

| Treatment                                                                                                        | Mean parasite burden $\pm$ SE |                |               |
|------------------------------------------------------------------------------------------------------------------|-------------------------------|----------------|---------------|
|                                                                                                                  | Spleen                        | Liver          | Bone marrow   |
| <b>Day 14</b>                                                                                                    |                               |                |               |
| WT (IL-4R $\alpha$ <sup>-/lox</sup> )                                                                            | 194 $\pm$ 16                  | 4144 $\pm$ 256 | 1038 $\pm$ 31 |
| CD4 <sup>+</sup> T cell-specific IL-4R $\alpha$ -deficient (Lck <sup>cre</sup> IL-4R $\alpha$ <sup>-/lox</sup> ) | 223 $\pm$ 45                  | 3597 $\pm$ 560 | 947 $\pm$ 108 |
| Global IL-4R $\alpha$ <sup>-/-</sup>                                                                             | 214 $\pm$ 31                  | 4223 $\pm$ 337 | 788 $\pm$ 181 |
| <b>Day 15</b>                                                                                                    |                               |                |               |
| WT (IL-4R $\alpha$ <sup>-/lox</sup> )                                                                            | 91 $\pm$ 16                   | 2349 $\pm$ 192 | 387 $\pm$ 106 |
| CD4 <sup>+</sup> T cell-specific IL-4R $\alpha$ -deficient (Lck <sup>cre</sup> IL-4R $\alpha$ <sup>-/lox</sup> ) | 143 $\pm$ 19                  | 2312 $\pm$ 192 | 528 $\pm$ 99  |

**Table S2:** Granuloma maturation in *L. donovani* infected CD4<sup>+</sup> T cell-specific IL-4R $\alpha$ -deficient (Lck<sup>cre</sup>IL-4R $\alpha$ <sup>-/lox</sup>), wild-type littermate control (IL-4R $\alpha$ <sup>-/lox</sup>) and global IL-4R $\alpha$ <sup>-/-</sup> BALB/c mice at day 14 and 15 post-infection in separate experiments. ND – not determined.

| Granuloma stage | Strain                                        |                                                                                                                  |                                      |
|-----------------|-----------------------------------------------|------------------------------------------------------------------------------------------------------------------|--------------------------------------|
|                 | WT control (IL-4R $\alpha$ <sup>-/lox</sup> ) | CD4 <sup>+</sup> T cell-specific IL-4R $\alpha$ -deficient (Lck <sup>cre</sup> IL-4R $\alpha$ <sup>-/lox</sup> ) | Global IL-4R $\alpha$ <sup>-/-</sup> |
| <b>Day 14</b>   |                                               |                                                                                                                  |                                      |
| Sterile         | 1.5 $\pm$ 1.1                                 | 0.4 $\pm$ 0.7                                                                                                    | 0.6 $\pm$ 1.1                        |
| Mature          | 6.8 $\pm$ 1.1                                 | 3.1 $\pm$ 1.7                                                                                                    | 2.7 $\pm$ 2.7                        |
| Immature        | 29.6 $\pm$ 7.1                                | 22.7 $\pm$ 6.4                                                                                                   | 17.4 $\pm$ 5.6                       |
| Kupffer cells   | 61.9 $\pm$ 6.7                                | 73.3 $\pm$ 7.9                                                                                                   | 67.2 $\pm$ 8.3                       |
| <b>Day 15</b>   |                                               |                                                                                                                  |                                      |
| Sterile         | 2.00 $\pm$ 0.8                                | 1.03 $\pm$ 0.9                                                                                                   | ND                                   |
| Mature          | 8 $\pm$ 2.5                                   | 5.83 $\pm$ 0.9                                                                                                   | ND                                   |
| Immature        | 28.18 $\pm$ 3.3                               | 30.30 $\pm$ 3.6                                                                                                  | ND                                   |
| Kupffer cells   | 59.32 $\pm$ 9.0                               | 62.5 $\pm$ 3.3                                                                                                   | ND                                   |

**Fig. S1:** Representative photomicrographs of the hepatic granuloma response in *L. donovani* infected wild-type ( $IL-4R\alpha^{-/lox}$ ),  $CD4^+$  T cell-specific  $IL-4R\alpha$ -deficient ( $Lck^{cre}IL-4R\alpha^{-/lox}$ ) and global  $IL-4R\alpha^{-/-}$  mice at day 15 post-infection. Immature granulomas and amastigotes within the Kupffer cells at Day 15 are denoted by (arrows).

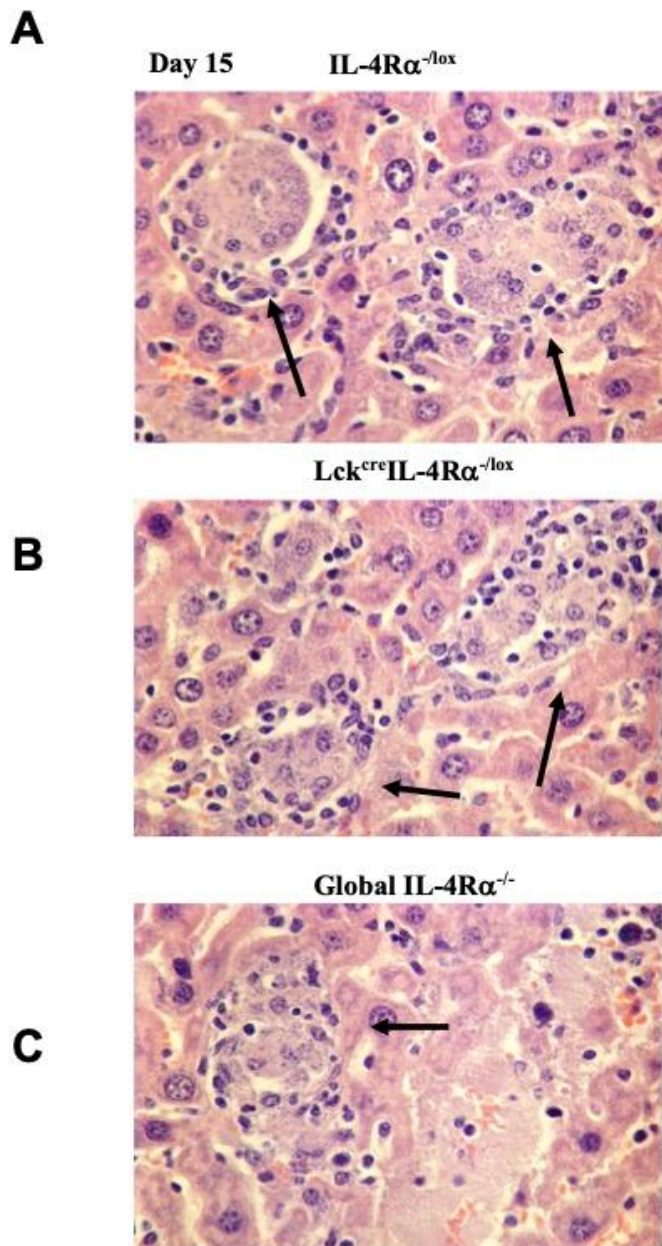

Supplement: Data_Sheet_1.pdf [file Data_Sheet_1.pdf]
